# Supplementary material for: Identification of Chemical Vapor Mixture Assisted by Artificially Extended Database for Environmental Monitoring
Source: MDPI journal article supplement (doi:10.3390/s22031169), 2022-02-03
Supplement: s1 [file s1]

## Supporting Information for

# Identification of chemical vapor mixture assisted by artificially extended database for environmental monitoring

Hi Gyu Moon<sup>1,†</sup>, Youngmo Jung<sup>2,†</sup>, Beomju Shin<sup>2</sup>, Donggeun Lee<sup>2</sup>, Kayoung Kim<sup>2</sup>, Deok Ha Woo<sup>2</sup>, Seok Lee<sup>2</sup>, Sooyeon Kim<sup>1</sup>, Chong-Yun Kang<sup>3,4</sup>, Taikjin Lee<sup>2,\*</sup> and Chulki Kim<sup>2,\*</sup>

<sup>1</sup> Center for Ecological Risk Assessment, Korea Institute of Toxicology (KIT), Jinju 52834, Republic of Korea

<sup>2</sup> Sensor System Research Center, Korea Institute of Science and Technology (KIST), Seoul 02792, Republic of Korea.

<sup>3</sup> Center for Electronic Materials, Korea Institute of Science and Technology (KIST), Seoul 136-791, Republic of Korea.

<sup>4</sup> KU-KIST Graduate School of Converging Science and Technology, Korea University, Seoul 02841, Republic of Korea.

\*e-mail: [taikjin.lee@kist.re.kr](mailto:taikjin.lee@kist.re.kr), [chulki.kim@kist.re.kr](mailto:chulki.kim@kist.re.kr)

<sup>†</sup> They made an equal contribution to this work

## Table of Content

**Table S1.** Identification accuracy of individual vapors and mixture vapors

**Figure S1.** Concept of data processing model to classify the mixture vapors based on database of individual vapors using by pattern recognition.

**Figure S2.** Experimental response curve of metal oxide sensor array for (a-b)  $\text{NO}_2$ , (c-d)  $\text{NH}_3$ , and (e-f)  $\text{HCHO}$  vapors in 150 and 200°C.

**Figure S3.** Experimental response curve of metal oxide sensor array for (a-b)  $\text{NO}_2 + \text{NH}_3$ , (c-d)  $\text{HCHO} + \text{NH}_3$ , (e-f)  $\text{NO}_2 + \text{HCHO}$  and (g-h)  $\text{HCHO} + \text{NO}_2 + \text{NH}_3$  vapors in 150 and 200°C.

**Figure S4.** Two dimensional PCA results of mixture vapors ( $\text{NO}_2 + \text{HCHO}$ ,  $\text{NO}_2 + \text{NH}_3$ ,  $\text{HCHO} + \text{NH}_3$ , and  $\text{HCHO} + \text{NO}_2 + \text{NH}_3$ ), which are projected to PC plane of individual vapors. In the inset area, all of vapors can be well classified.

Table S1. Identification accuracy of individual vapors and mixture vapors

| Type       | Vapors                                 | Test | Results | Accuracy |
|------------|----------------------------------------|------|---------|----------|
| Individual | NO <sub>2</sub>                        | 9    | 9       | 100%     |
|            | NH <sub>3</sub>                        | 9    | 9       | 100%     |
|            | HCHO                                   | 9    | 9       | 100%     |
| Mixture    | NO <sub>2</sub> +NH <sub>3</sub>       | 9    | 9       | 100%     |
|            | NH <sub>3</sub> +HCHO                  | 9    | 8       | 89%      |
|            | HCHO+NO <sub>2</sub>                   | 9    | 8       | 89%      |
|            | NO <sub>2</sub> +NH <sub>3</sub> +HCHO | 9    | 8       | 89%      |

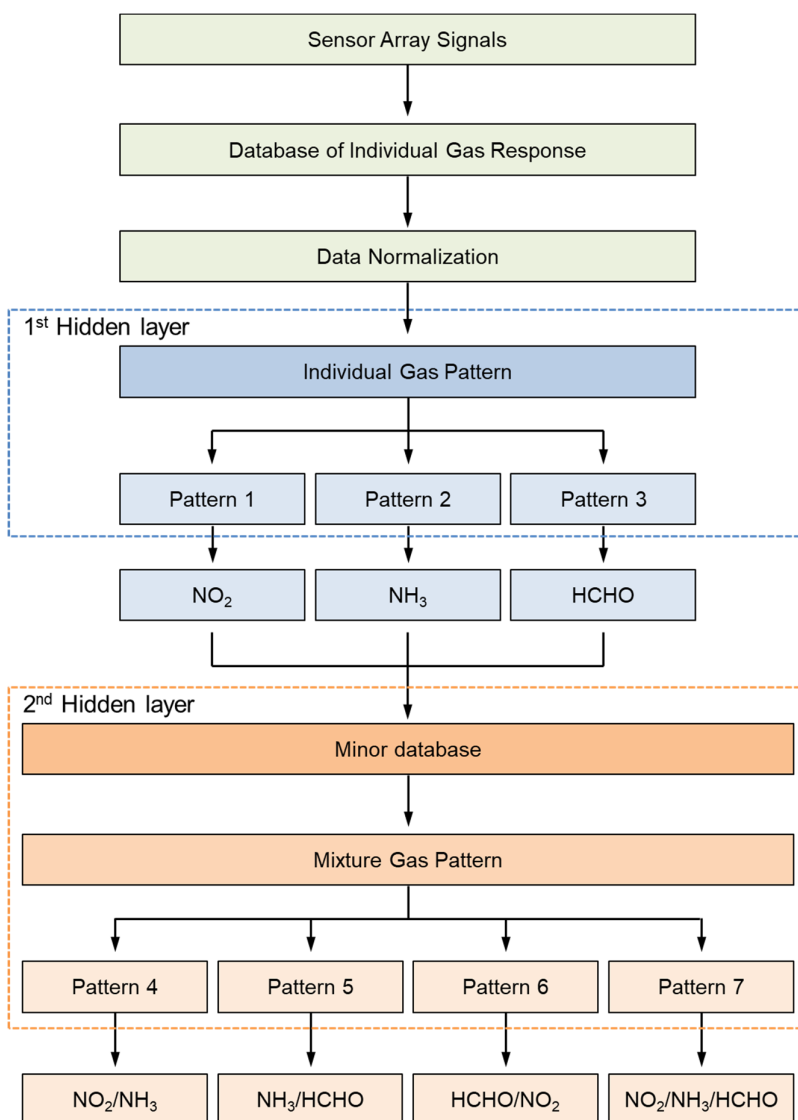

**Figure S1.** Concept of data processing model to classify the mixture vapors based on database of individual vapors using by pattern recognition.

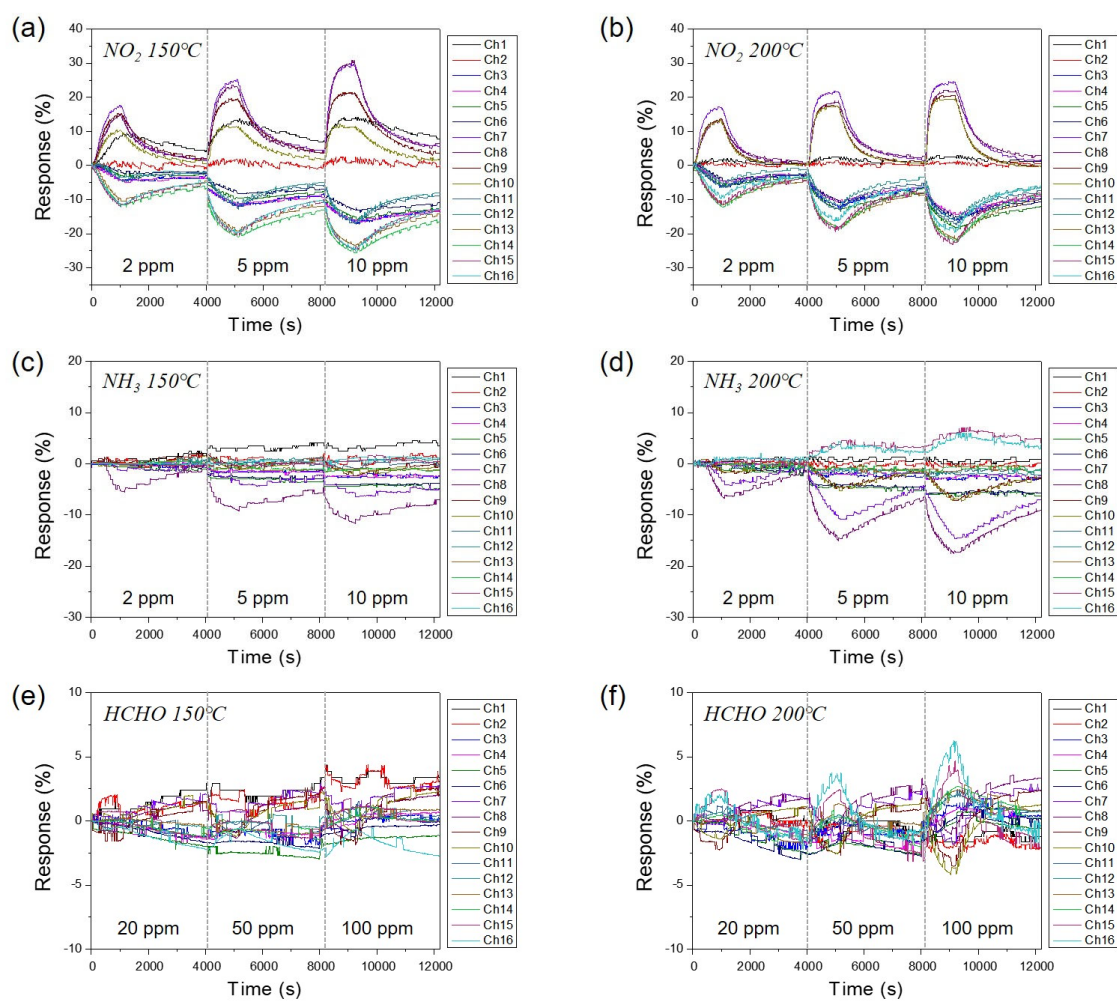

**Figure S2.** Experimental response curve of metal oxide sensor array for (a-b)  $\text{NO}_2$ , (c-d)  $\text{NH}_3$ , and (e-f)  $\text{HCHO}$  vapors in 150 and 200°C.

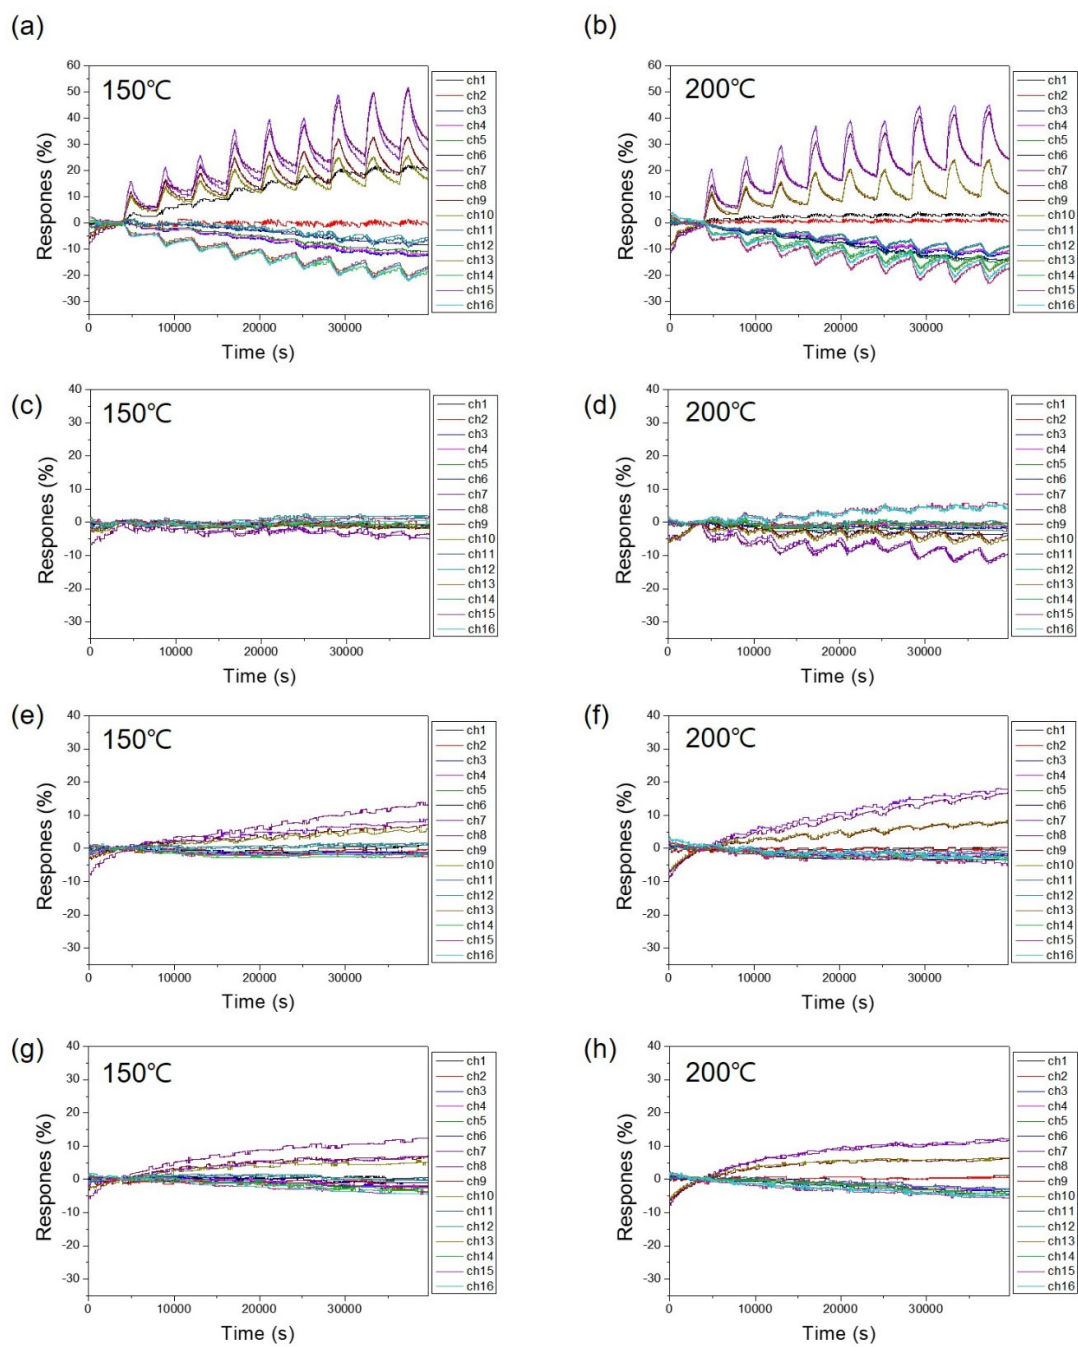

**Figure S3.** Experimental response curve of metal oxide sensor array for (a-b)  $\text{NO}_2 + \text{NH}_3$ , (c-d)  $\text{HCHO} + \text{NH}_3$ , (e-f)  $\text{NO}_2 + \text{HCHO}$  and (g-h)  $\text{HCHO} + \text{NO}_2 + \text{NH}_3$  vapors in 150 and 200°C.

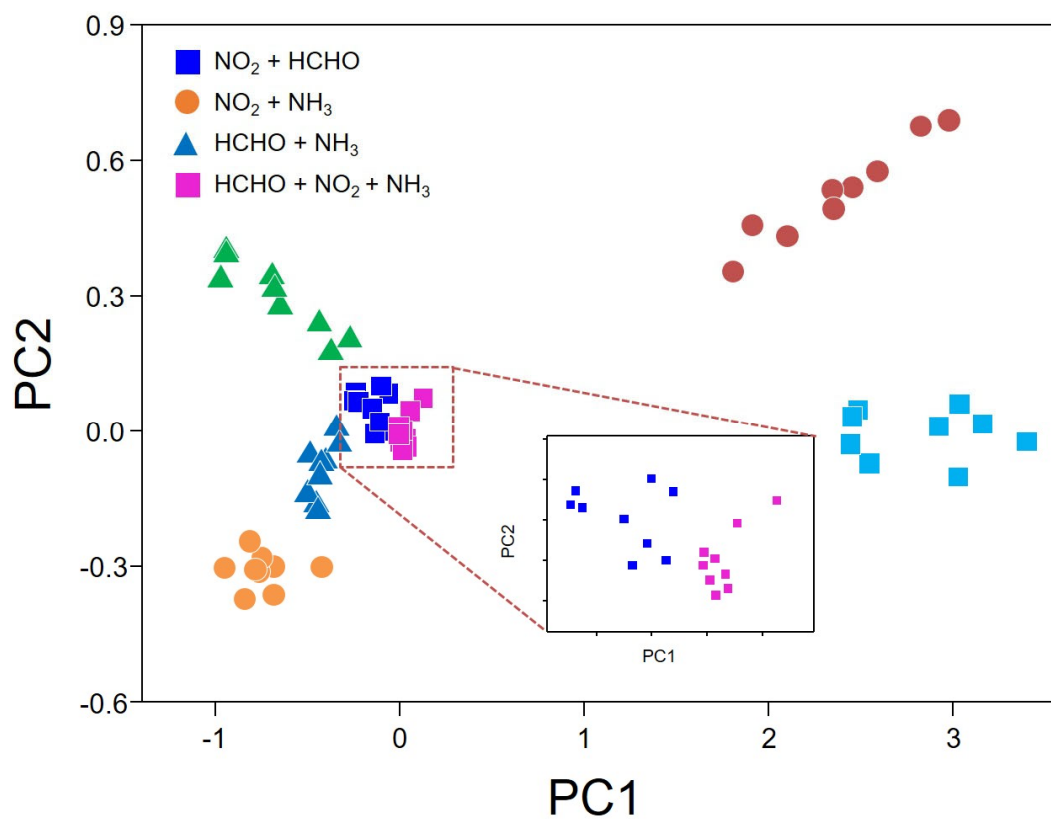

**Figure S4.** Two dimensional PCA results of mixture vapors ( $\text{NO}_2 + \text{HCHO}$ ,  $\text{NO}_2 + \text{NH}_3$ ,  $\text{HCHO} + \text{NH}_3$ , and  $\text{HCHO} + \text{NO}_2 + \text{NH}_3$ ), which are projected to PC plane of individual vapors. In the inset area, all of vapors can be well classified.
